# Supplementary material for: 1-Hexene: a renewable C6 platform for full-performance jet and diesel fuels
Source: Royal Society of Chemistry journal article supplement (doi:10.1039/c3gc41554f), 2013-09-11
Supplement: c3gc41554f.pdf [file c3gc41554f.pdf]

## Supporting Information For

### **1-Hexene: A Renewable C6 Platform for Full-Performance Jet and Diesel Fuels**

Benjamin G. Harvey\* and Heather A. Meylemans

*US NAVY, NAWCWD, Research Department, Chemistry Division, China Lake, California 93555*

#### **Contents**

|                                                                      | <u>Page</u> |
|----------------------------------------------------------------------|-------------|
| <sup>1</sup> H NMR spectrum for 5-methyleneundecane .....            | S2          |
| <sup>13</sup> C NMR spectrum for 5-methyleneundecane .....           | S2          |
| <sup>1</sup> H NMR spectrum for 5-methylundecane .....               | S3          |
| <sup>13</sup> C NMR spectrum for 5-methylundecane .....              | S3          |
| <sup>1</sup> H NMR spectrum for 7-butyl-5-methylenetri-decane .....  | S4          |
| <sup>13</sup> C NMR spectrum for 7-butyl-5-methylenetri-decane ..... | S4          |
| <sup>1</sup> H NMR spectrum for 7-butyl-5-methyltri-decane .....     | S5          |
| <sup>13</sup> C NMR spectrum for 7-butyl-5-methyltri-decane .....    | S5          |

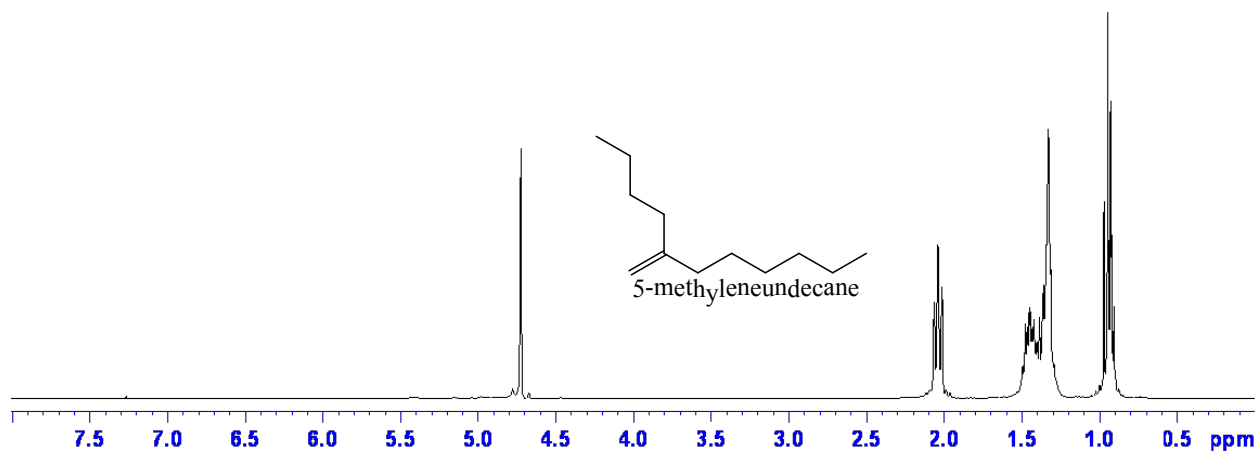

Figure S1.  $^1\text{H}$  NMR spectrum of 5-methyleneundecane

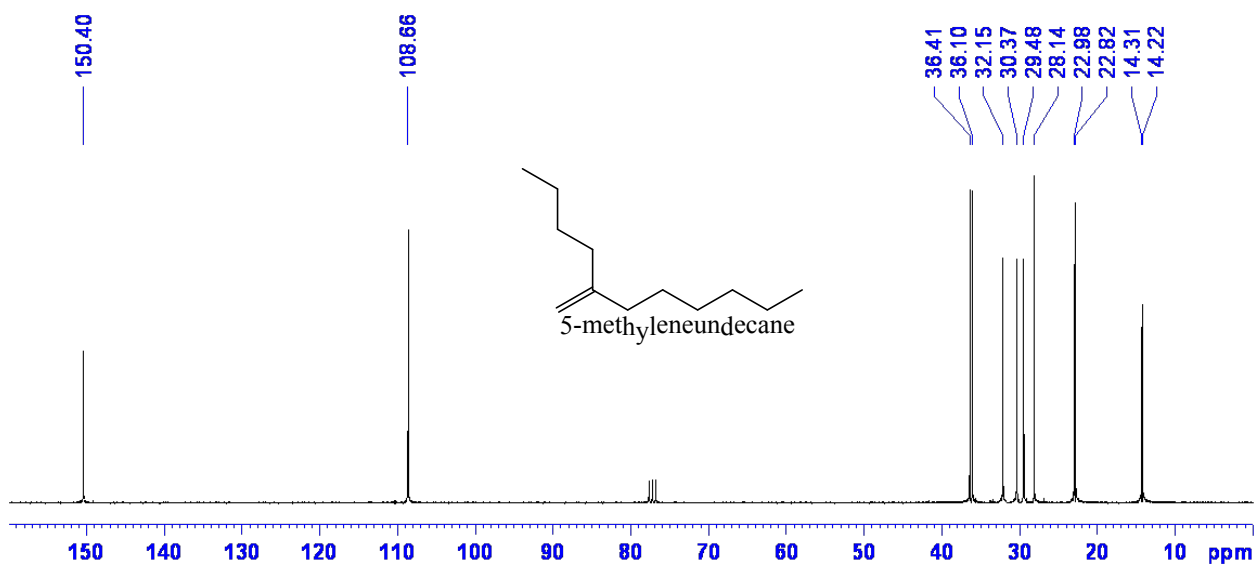

Figure S2.  $^{13}\text{C}$  NMR spectrum of 5-methyleneundecane

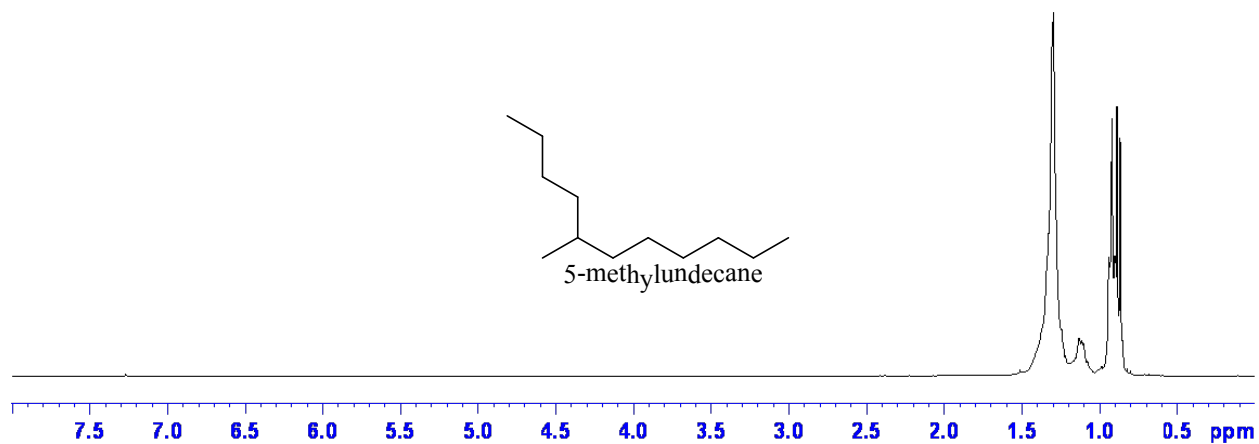

Figure S3. <sup>1</sup>H NMR spectrum of 5-methylundecane

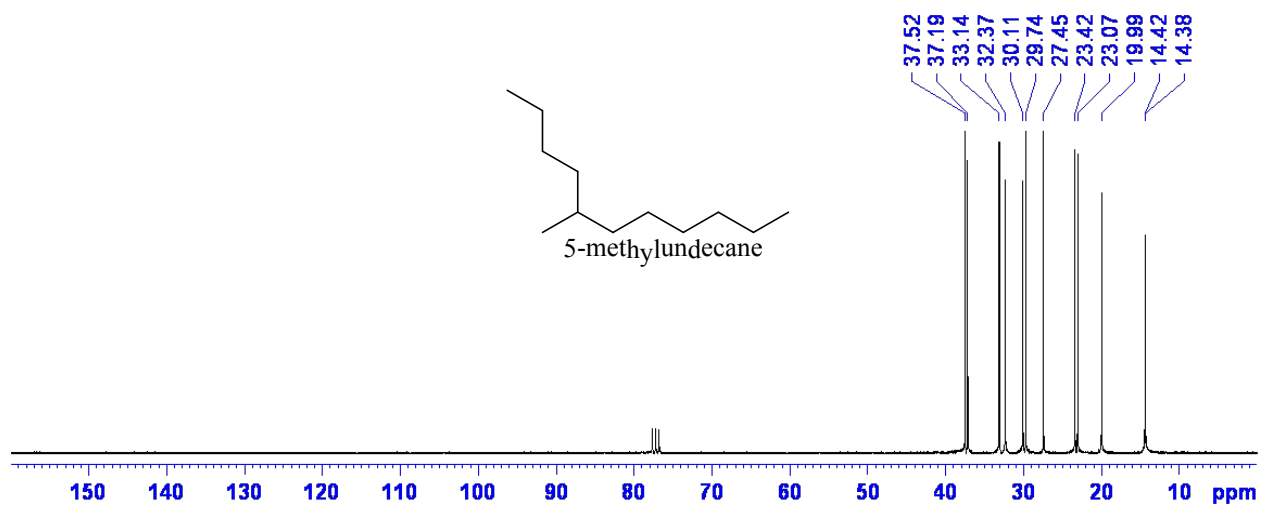

Figure S4. <sup>13</sup>C NMR spectrum of 5-methylundecane

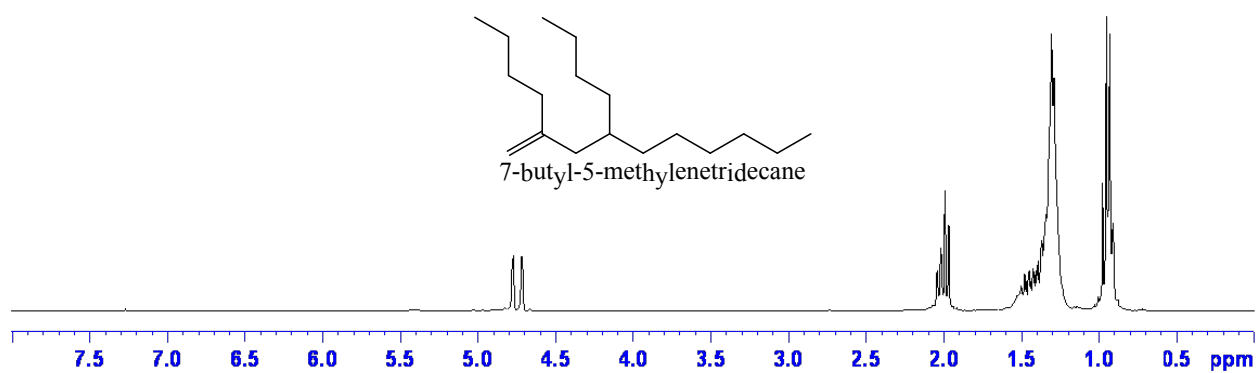

Figure S5. <sup>1</sup>H NMR spectrum of 7-butyl-5-methylenetriecane

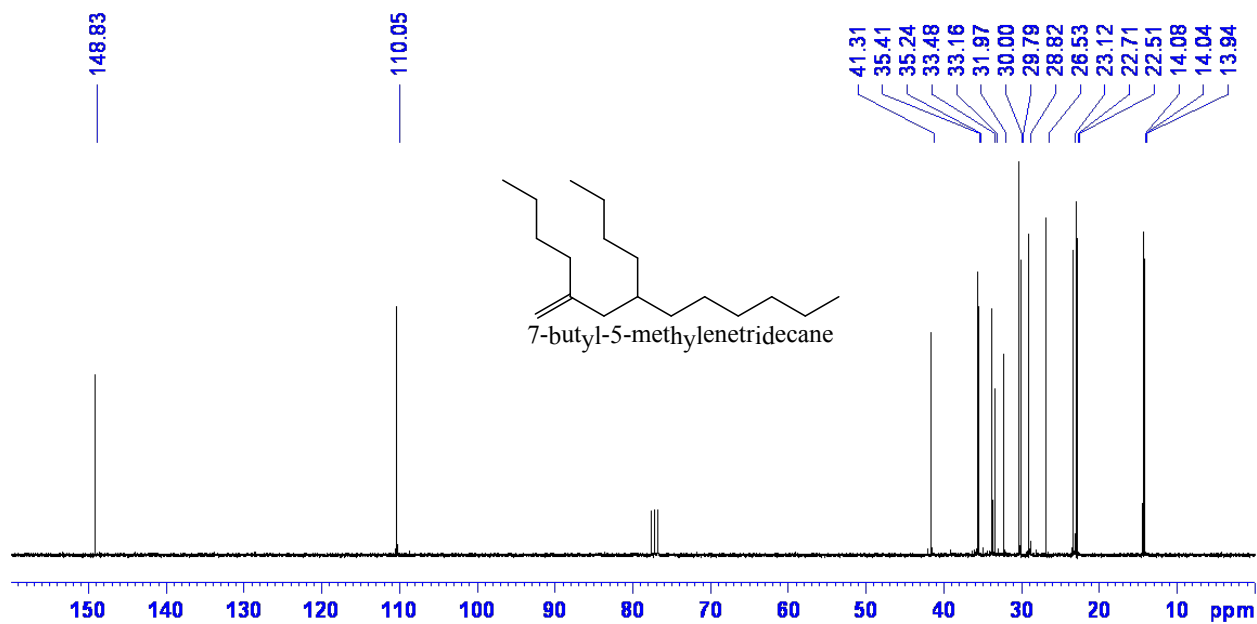

Figure S6. <sup>13</sup>C NMR spectrum of 7-butyl-5-methylenetriecane

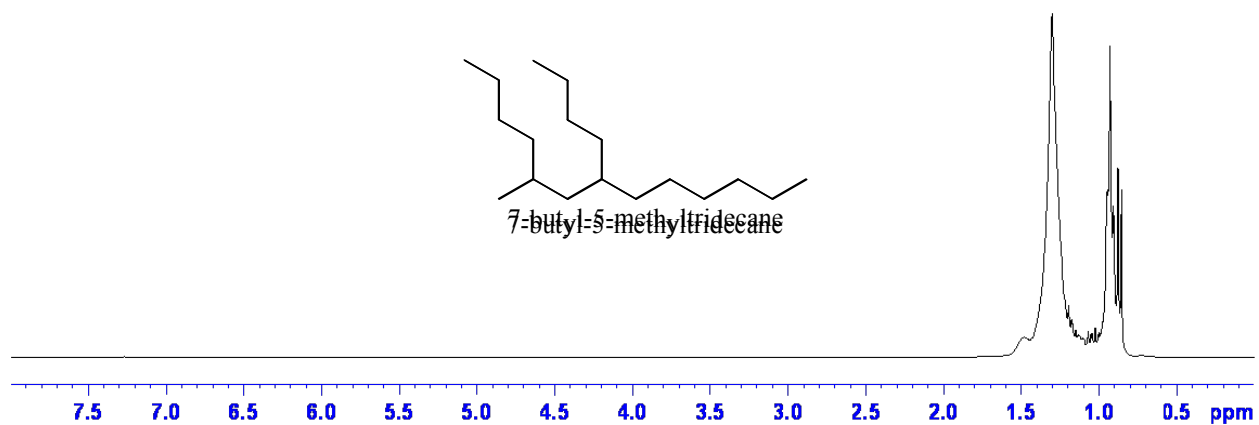

Figure S7. <sup>1</sup>H NMR spectrum of 7-butyl-5-methyltridecane

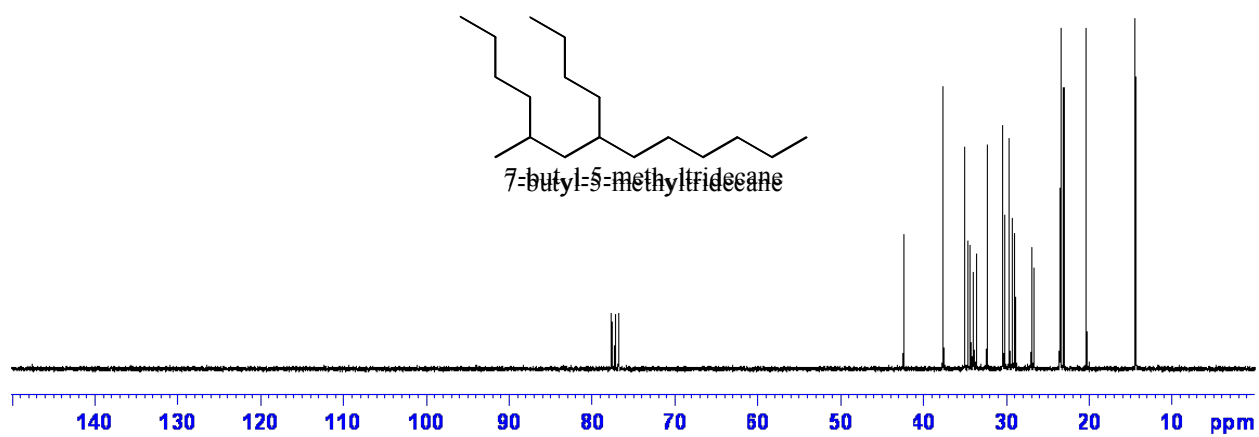

Figure S8. <sup>13</sup>C NMR spectrum of 7-butyl-5-methyltridecane
